# Supplementary material for: The dependence of albedo on different factors for refreezing melt ponds in the Arctic
Source: Copernicus journal article supplement (doi:10.5194/tc-20-351-2026), 2026-01-19
Supplement: Supplementary file [file tc-20-351-2026-supplement-title-page.pdf › tc-20-351-2026-supplement-title-page.pdf]

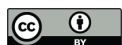

## *Supplement of*

# **The dependence of albedo on different factors for refreezing melt ponds in the Arctic**

**Jialiang Zhu et al.**

*Correspondence to:* Tao Li (litao@ouc.edu.cn)

- tc-20-351-2026-supplement-title-page.pdf
- CNR4.zip
- Ramses\_ACC-VIS.zip

The copyright of individual parts of the supplement might differ from the article licence.
